# Supplementary material for: Acquisition of natural humoral immunity to P. falciparum in early life in Benin: impact of clinical, environmental and host factors
Source: PubMed Central journal article supplement (PMC5037375; doi:10.1038/srep33961), 2016-09-27
Supplement: srep33961-s1.pdf [file srep33961-s1.pdf]

Acquisition of natural humoral immunity to *P. falciparum* in early life in Benin: impact of clinical, environmental and host factors

Célia Dechavanne\*,1,2, Ibrahim Sadissou3, Aziz Bouraima3, Claude Ahouangninou3, Roukiyath Amoussa3, Jacqueline Milet1,2, Kabirou Moutairou4, Achille Massougboji4, Michael Theisen5,6, Edmond J. Remarque7, David Courtin1,2, Gregory Nuel8, Florence Migot-Nabias1,2, André Garcia1,2

**Supplementary Material 1: Recombinant protein information and ELISA dilutions**

| Recombinant protein information |                  |                                                           |                      |                                                                    |            | ELISA dilutions |                                                              |                                                              |
|---------------------------------|------------------|-----------------------------------------------------------|----------------------|--------------------------------------------------------------------|------------|-----------------|--------------------------------------------------------------|--------------------------------------------------------------|
| Recombinant antigen             | Strain           | Amino acids positions                                     | System of expression | Laboratory source                                                  | References | IgG classes     | Dilution for maternal, cord and 3-month infant blood samples | Dilution for 6-, 9-, 12-, 15-, 18-month infant blood samples |
| AMA1                            | FVO              | 25-545                                                    | Pichia pastoris      | The Biomedical Primate Research Centre (Rijswijk, The Netherlands) | [1]        | Total IgG       | 1:2000                                                       | 1:500                                                        |
|                                 |                  |                                                           |                      |                                                                    |            | IgG1            | 1:1000                                                       | 1:50                                                         |
|                                 |                  |                                                           |                      |                                                                    |            | IgG3            | 1:100                                                        | 1:50                                                         |
| MSP1-19                         | Uganda-Palo-Alto | 1-43 and 1615-1723                                        | Baculovirus/insect   | Pasteur Institute (Paris, France)                                  | [2]        | Total IgG       | 1:200                                                        | 1:100                                                        |
|                                 |                  |                                                           |                      |                                                                    |            | IgG1            | 1:200                                                        | 1:50                                                         |
|                                 |                  |                                                           |                      |                                                                    |            | IgG3            | 1:500                                                        | 1:50                                                         |
| MSP2-3D7                        | F32              | whole protein without the secretion signal and GPI anchor | E. coli              | La Trobe University (Melbourne, Australia)                         | [3,4]      | Total IgG       | 1:200                                                        | 1:100                                                        |
|                                 |                  |                                                           |                      |                                                                    |            | IgG1            | 1:200                                                        | 1:50                                                         |
|                                 |                  |                                                           |                      |                                                                    |            | IgG3            | 1:500                                                        | 1:50                                                         |
| MSP2-FC27                       | F32              | whole protein without the secretion signal and GPI anchor | E. coli              | La Trobe University (Melbourne, Australia)                         | [3,4]      | Total IgG       | 1:200                                                        | 1:100                                                        |
|                                 |                  |                                                           |                      |                                                                    |            | IgG1            | 1:200                                                        | 1:50                                                         |
|                                 |                  |                                                           |                      |                                                                    |            | IgG3            | 1:500                                                        | 1:50                                                         |
| MSP3                            | F32              | 212-380                                                   | E. Coli              | Statens Serum Institute (Copenhagen, Denmark)                      | [5,6]      | Total IgG       | 1:200                                                        | 1:100                                                        |
|                                 |                  |                                                           |                      |                                                                    |            | IgG1            | 1:200                                                        | 1:50                                                         |
|                                 |                  |                                                           |                      |                                                                    |            | IgG3            | 1:100                                                        | 1:50                                                         |
| GLURP-R0                        | F32              | 25-514                                                    | E. Coli              | Statens Serum Institute (Copenhagen, Denmark)                      | [5,6]      | Total IgG       | 1:200                                                        | 1:100                                                        |
|                                 |                  |                                                           |                      |                                                                    |            | IgG1            | 1:200                                                        | 1:50                                                         |
|                                 |                  |                                                           |                      |                                                                    |            | IgG3            | 1:100                                                        | 1:50                                                         |
| GLURP-R2                        | F32              | 706-1178                                                  | E. Coli              | Statens Serum Institute (Copenhagen, Denmark)                      | [5,6]      | Total IgG       | 1:200                                                        | 1:100                                                        |
|                                 |                  |                                                           |                      |                                                                    |            | IgG1            | 1:200                                                        | 1:50                                                         |
|                                 |                  |                                                           |                      |                                                                    |            | IgG3            | 1:500                                                        | 1:50                                                         |

Legend: An anti-human IgG1 (NL16 clone) diluted 1:2000 and an anti-human IgG3 (ZG4 clone) diluted 1:5000 (Skybio, France) were used as a peroxidase-conjugated goat anti-mouse IgG diluted 1:3000 (Invitrogen, France) for revealing the reaction.
